# Supplementary material for: CTCF modulates Estrogen Receptor function through specific chromatin and nuclear matrix interactions
Source: PubMed Central journal article supplement — Nucleic Acids Res. 2016 Sep 15;44(22):10588–602. doi: 10.1093/nar/gkw785 (PMC5159541; doi:10.1093/nar/gkw785), 2016-09-15

**Additional file 1**

MCF-7 cells: WB for CTCF, ER, FOXA1 and Lamin B

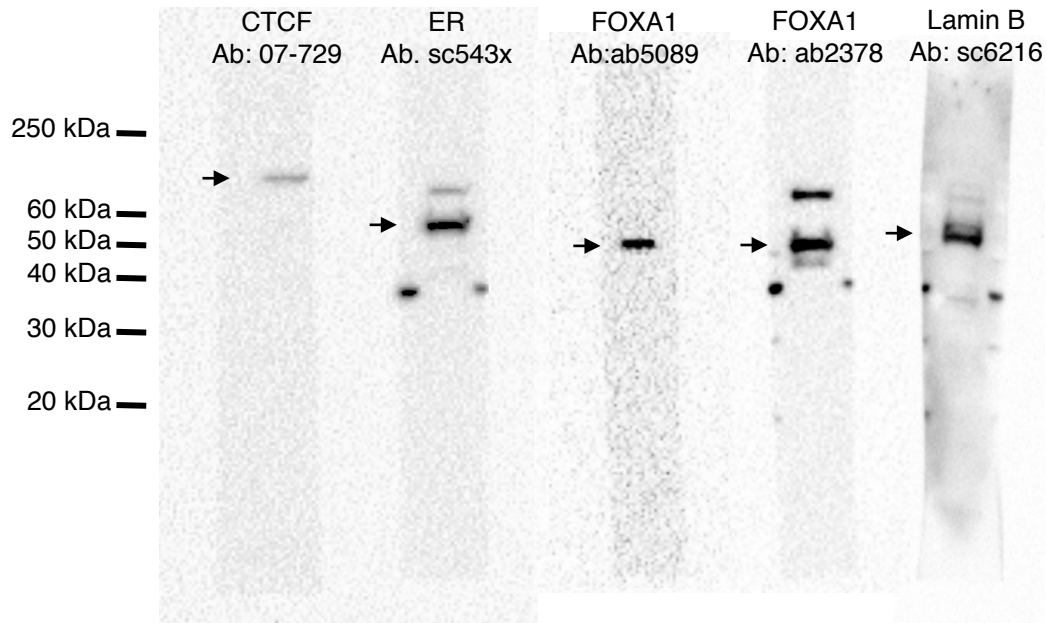

**Additional file 2**

**A** Pearson correlation plot of estrogen-regulated CTCF chromatin binding

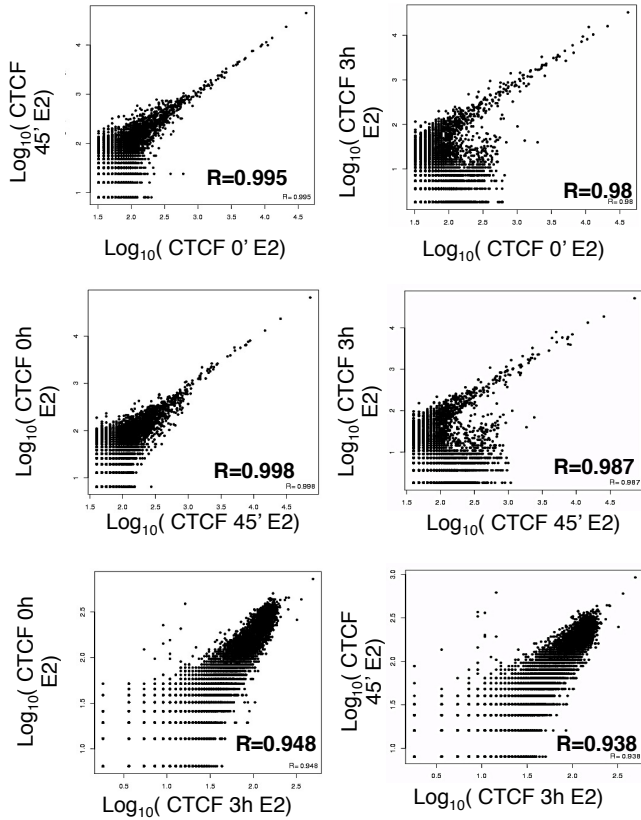

**B** Re-ChIP at 3h preferred CTCF sites

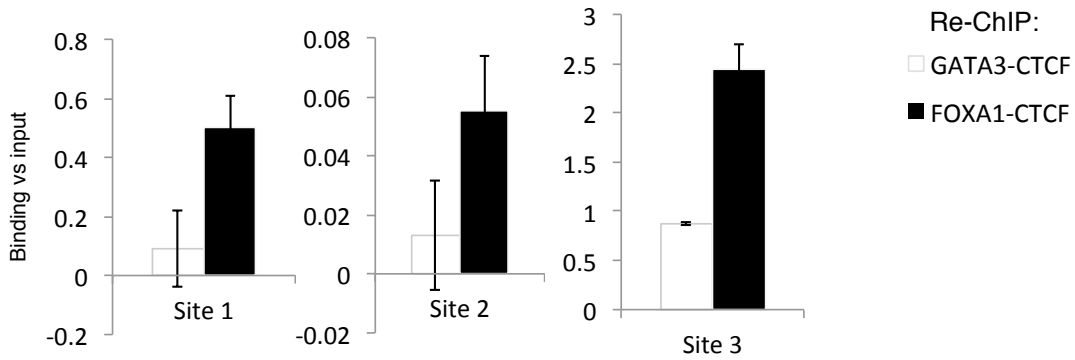

### Additional File 3

#### A Transcription Factor Binding at GRO-seq regions with or without CTCF binding

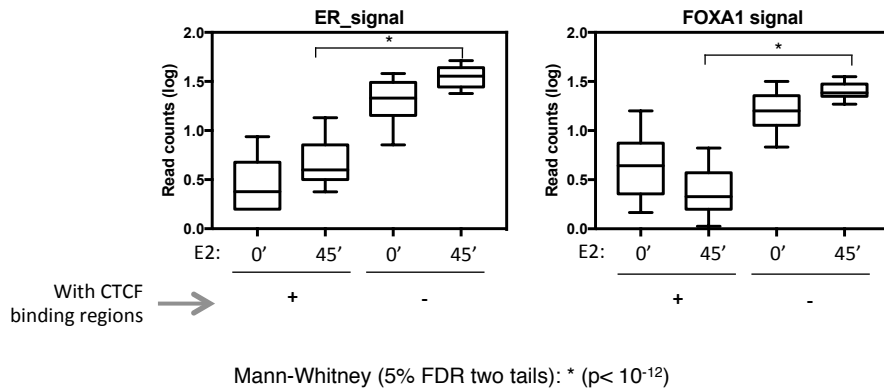

#### B Histone modification

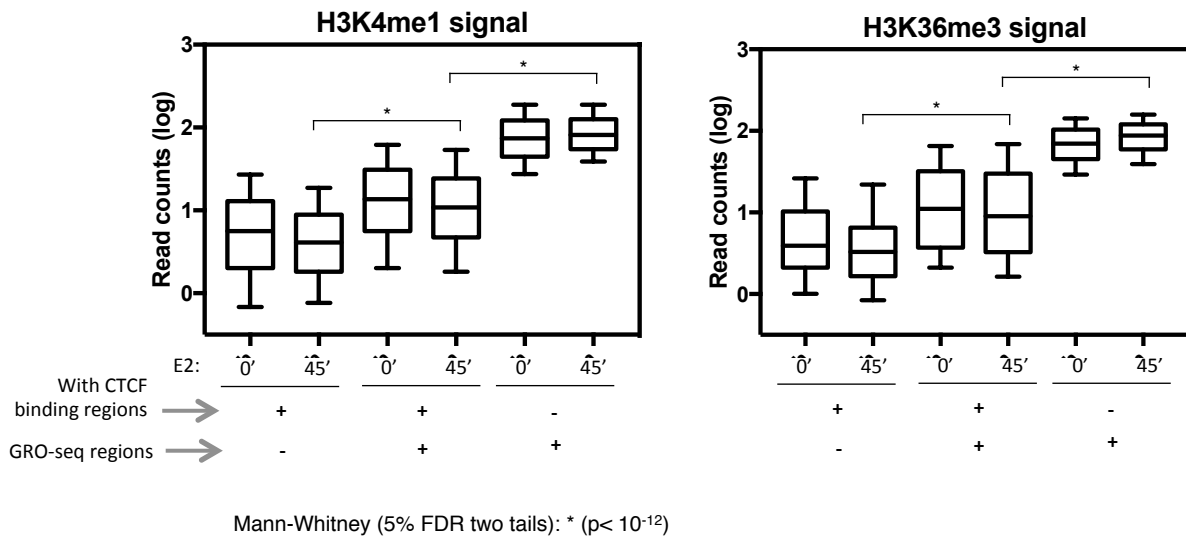

## Additional File 4

### A Analysis of CTCF binding distribution within ER-ER loops (ER ChIA-PET from Fullwood et al., 2009)

#### ER loops without CTCF binding

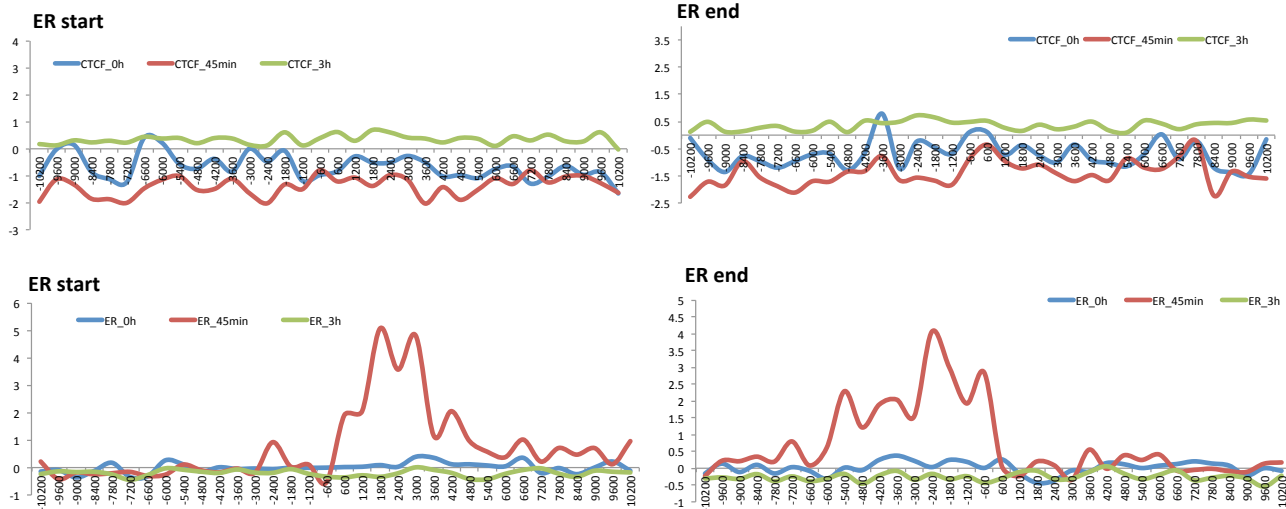

### B ER ChIP-PCR at ER loops

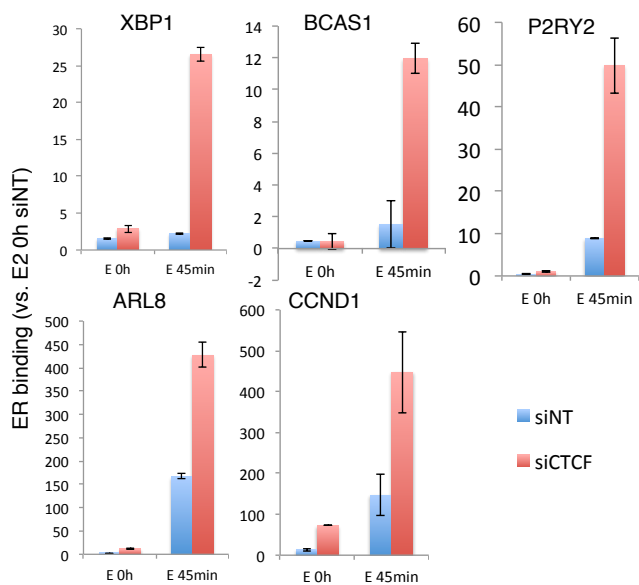

## Additional file 5

### A List of genes estrogen and CTCF modulated

| CTCF repressed genes |              |            |              |          | CTCF induced genes |          |           |
|----------------------|--------------|------------|--------------|----------|--------------------|----------|-----------|
| ABCA17P              | KCNN3        | SERPINB9   | CRISPLD2     | PADI4    | ABCC13             | PPM1K    | HEG1      |
| ACVR1C               | KCNQ1        | SH2D3C     | CXCL12       | PBX4     | ABHD12B            | PRR15    | HLA-DRB6  |
| ADRA2B               | KIF26B       | SH3TC1     | CXXC5        | PCNA     | ACSL5              | QDPR     | IER3      |
| ARL8A                | KLF13        | SLC38A11   | DAAM2        | PCYOXA1L | ADAMTS9            | RASGRP1  | IL10RA    |
| ASB2                 | KLHL14       | SMOX       | DHRS3        | PDK4     | AQP3               | RBM24    | LAMC2     |
| ASTN2                | KRT24        | SMTNL2     | DLL1         | PDLIM2   | BCL11B             | RELB     | LARGE     |
| ATP4A                | KRT37        | SSTR2      | DMRT2        | PIP5KL1  | BIRC3              | RGS7BP   | LGR4      |
| B3GNT3               | KRT73        | ST6GALNAC4 | DNMT3B       | PIWIL4   | C22orf24           | SFXN2    | LIMK1     |
| B4GALNT3             | LHX4         | SYT12      | E2F2         | PKP1     | CADM1              | SLC16A9  | MAP3K5    |
| BCAS4                | LMAN1L       | TANC1      | EGFR         | PLA2G16  | CAV1               | SLC22A23 | MED13L    |
| C14orf132            | LOC100133669 | TBC1D10A   | ELF3         | PNPLA3   | CD36               | SLC27A4  | MERTK     |
| C1orf194             | LOC81691     | TFF2       | ELL          | PODXL    | CDRT1              | SLFN5    | MID1      |
| C1QTNF1              | LOX          | TMEM64     | EMP2         | PPP2R2C  | CEACAM1            | SPTLC3   | MTHFD1L   |
| CA8                  | LPAR1        | TMIE       | FAM43A       | PRKCA    | COL27A1            | ST3GAL5  | MUS81     |
| CACNA1I              | LRG1         | TMPRSS2    | FARP1        | PRUNE    | CREG2              | STX11    | N4BP3     |
| CD44                 | LRP4         | TNFAIP8L3  | FDXR         | PSPH     | CTGF               | TGM2     | NRP2      |
| CHEK2                | LRTM2        | TNS1       | FUT4         | PTGES    | DTX3L              | TNS3     | NRXN3     |
| CHST8                | MAFB         | TNS4       | GADD45B      | RAB36    | EDN1               | UGT8     | OPN3      |
| CIB2                 | MAN1C1       | TUBA3D     | GAL          | RAB37    | ENPP2              | VDR      | PDLIM7    |
| CITED1               | MAT1A        | VASN       | GINS2        | RASSF3   | EPDR1              | WISP2    | PKFEB3    |
| CYP26A1              | MB           | WNT16      | GLB1L2       | RGS10    | ETV6               | 40238    | PIP5K1C   |
| CYP46A1              | MICAL2       | WNT4       | GLRB         | RGS3     | FAT1               | ABAT     | PLAT      |
| CYP4F3               | MYBL1        | 38231      | GPRIN1       | RHOD     | FILIP1L            | ABCC3    | PLEKH01   |
| DPYSL4               | MYOT         | ABCA3      | GPSM1        | SCNN1G   | FLRT3              | ABCG2    | PLOD2     |
| DSCAML1              | MYRIP        | ACOT4      | GRIN2C       | SERINC2  | FMO1               | ABLIM1   | PPARGC1B  |
| EDN2                 | NECAB2       | ACSS1      | HDAC11       | SERPINE2 | FRMD3              | ALX4     | PRSS23    |
| EFCAB10              | NKAIN1       | ADARB1     | HDCC2        | SLBP     | G6PD               | ANXA2    | RHBDF2    |
| ERG                  | NLRP6        | ADORA1     | HOXC8        | SLC16A3  | GBP1               | APCDD1   | RND3      |
| FADS2                | NTN1         | ADRB1      | HSPA1L       | SLC25A42 | GBP2               | ATXN1    | RPL22L1   |
| FAIM3                | OSCAR        | AHDC1      | ICOSLG       | SLC29A1  | GMPR               | BACE1    | RUSC2     |
| FAM13C               | OTOF         | AHNAK2     | ITGA6        | SLC46A2  | HAAO               | BOK      | SETBP1    |
| FAM25A               | PADI3        | ALS2CL     | KBTBD6       | SMOC2    | HERC5              | BTN2A2   | SKAP2     |
| FAM46C               | PC           | ANXA9      | KCNMA1       | SNX24    | HERC6              | C4orf19  | SLC27A2   |
| FBXO43               | PGLYRP2      | B4GALNT2   | KCTD6        | SPRY4    | HLA-C              | CAPG     | SORCS2    |
| FCGR2B               | PLA2G4D      | B4GALT1    | KHDRBS3      | STARDS5  | HLA-DRB1           | CHN2     | SRF       |
| FCGR2C               | PLXDC1       | BACE2      | LOC285593    | STK32C   | HLA-DRB5           | CHST11   | STK10     |
| FGF19                | PLXNA4       | BRIP1      | LONRF2       | TBC1D2   | HOXB4              | CYP1A1   | TBXA1     |
| FGFBP2               | POM121L9P    | C10orf107  | LOXL1        | TBX2     | IRF1               | DENND5B  | TCF7L1    |
| FLI12825             | POU3F2       | C6orf222   | LSM11        | TRPC6    | ISG20              | DOCK4    | TFF1      |
| GABRD                | PIPF         | CABLES2    | LSM2         | TSC22D3  | JPH2               | DTNA     | TMC5      |
| GADD45G              | PPM1J        | CALD1      | MCM6         | UBE2S    | KLF7               | DUSP4    | TNFRSF10A |
| GATA5                | PRC1         | CCDC88C    | MFNG         | UBE2T    | KRT81              | DUSP5    | TNRC6C    |
| GATSL3               | PREX1        | CCR7       | MITF         | UNC119   | MAP6D1             | ETS2     | TPST2     |
| GCK                  | PRSS27       | CDC25A     | MMP11        | UNC5A    | ME3                | FAT4     | TRIM16L   |
| GNAT1                | PTGS1        | CDC47      | MN1          | VAV2     | MSRB3              | FGFR2    | UCA1      |
| GPR20                | PTPRH        | CDR2L      | MYLK         | WFS1     | NFE2               | FLNA     | ULK1      |
| GRIK3                | REEP1        | CGNL1      | NANOS1       | WNT5B    | NKD2               | FOSL2    | USP35     |
| GRK5                 | RET          | CHPT1      | NCOR2        | ZMIZ1    | NOLC1              | FRAS1    | VCAN      |
| GRM4                 | RHOBTB1      | CHST12     | NDRG1        | ZMYND8   | NTN4               | FST      | WIPF1     |
| HPN                  | SCN4B        | CLMN       | NECAB1       | ZNF473   | PAPSS2             | GALNT2   | WWC3      |
| IGSF22               | SDC1         | CLN8       | NPR3         | ZNF799   | PARP9              | GATA6    | ZDHHC22   |
| IL17RB               | SDK2         | COL21A1    | NPTX1        |          | PDLIM3             | GPD1L    | ZDHHC9    |
| ISOC1                | SEMA3G       | COTL1      | OLFML2A      |          | PLEKHF1            | GPR56    | ZNF462    |
| KCNG3                | SERPINA5     | CRELD2     | <b>P2RY2</b> |          | PML                | GRAMD1A  | ZYX       |

### B RT-PCR of CTCF repressed genes upon CTCF depletion

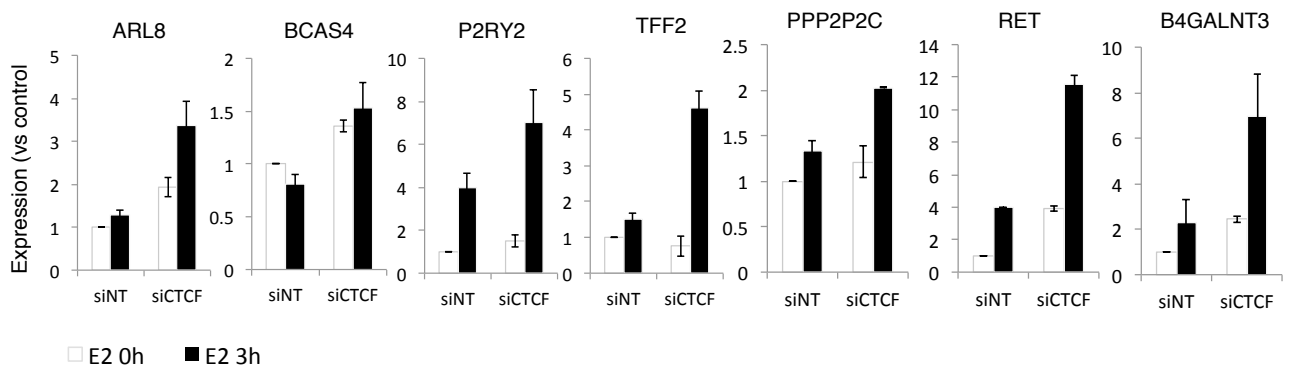

## Additional file 6

### A Dose-dependent CTCF and ER protein levels

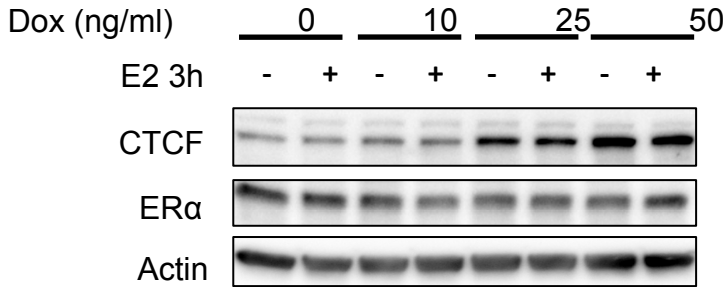

### B mRNA expression analysis of E2-induced genes and CTCF repressed

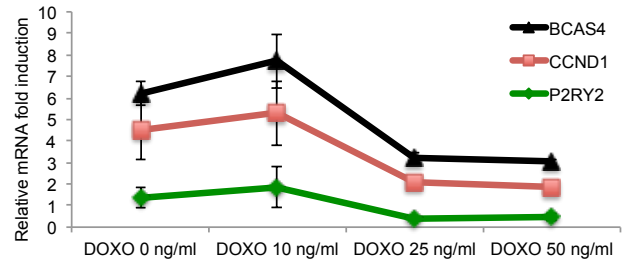

### C Metacore Pathway analysis of genes enriched to cell cycle

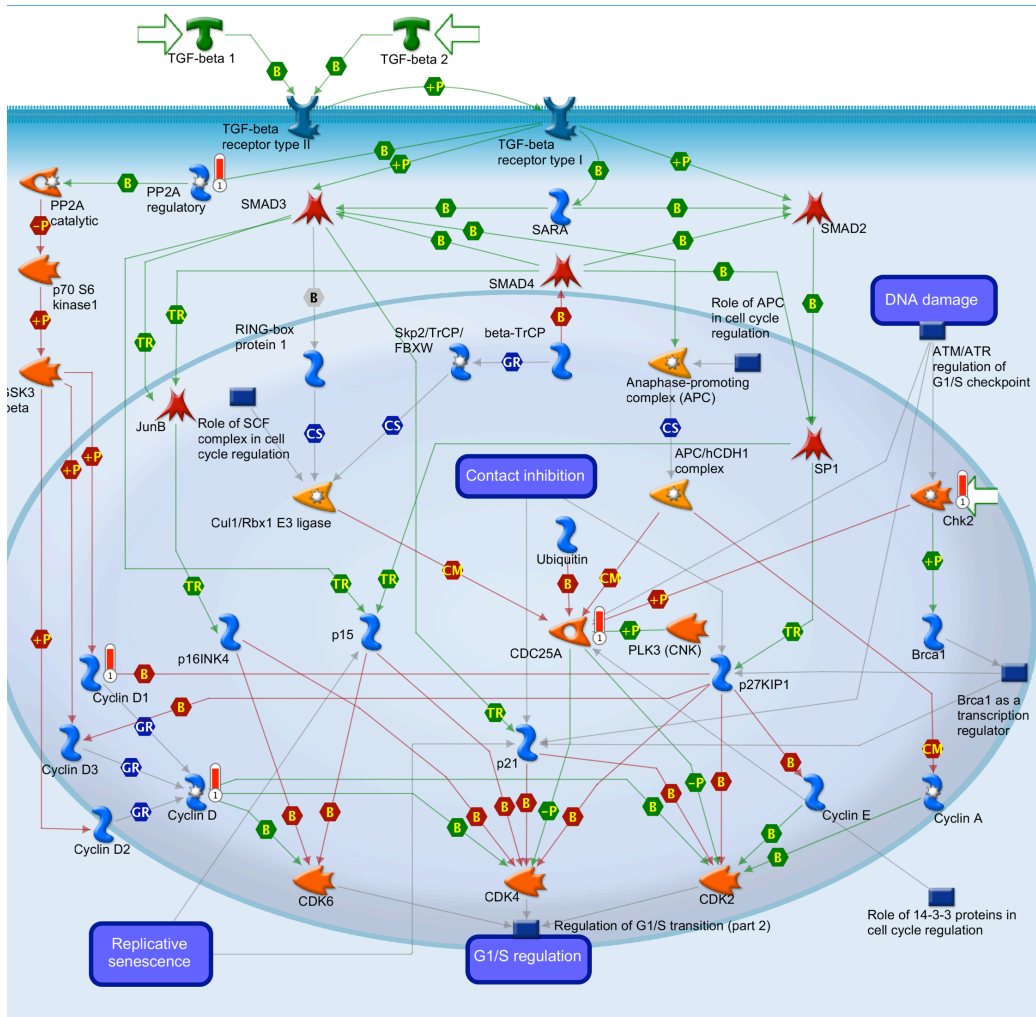

## Additional file 7

### A CTCF IP and Lamin B blot

E2 45min: - + -

IP Lamin B Blot: 

Supernadant Lamin B Blot: 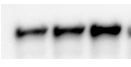

IP: CTCF IgG

### B Analysis of Lamin B binding distribution within ER-ER loops

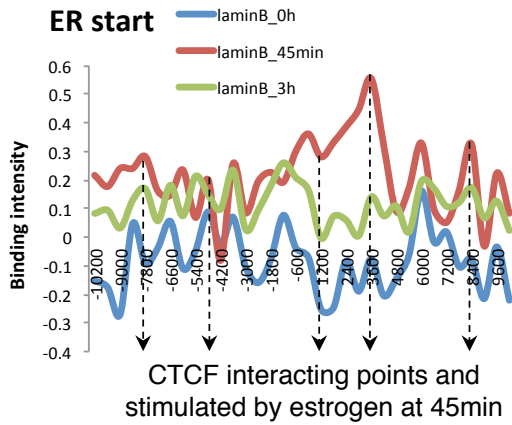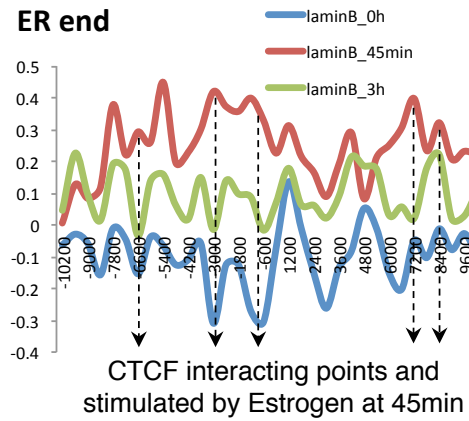

Supplement: supp_gkw785_nar-00126-x-2016-File004.pdf [file supp_gkw785_nar-00126-x-2016-File004.pdf]
